# Supplementary material
Source: PubMed Central journal article supplement (PMC4052267)
Supplement: mmc1.pdf [file mmc1.pdf]

**Supporting Material for:**

**Autocrine A2 in the T-System of Ventricular Myocytes Creates Transmural Gradients in Ion Transport: A Mechanism to Match Contraction with Load?**

Junyuan Gao, Xiurong Sun, Irina A. Potapova, Ira S. Cohen, Richard T. Mathias\*, Jeremy H. Kim

Department of Physiology & Biophysics

SUNY at Stony Brook

Stony Brook, NY 11794-8661

\*Corresponding author email: [richard.mathias@sunysb.edu](mailto:richard.mathias@sunysb.edu)

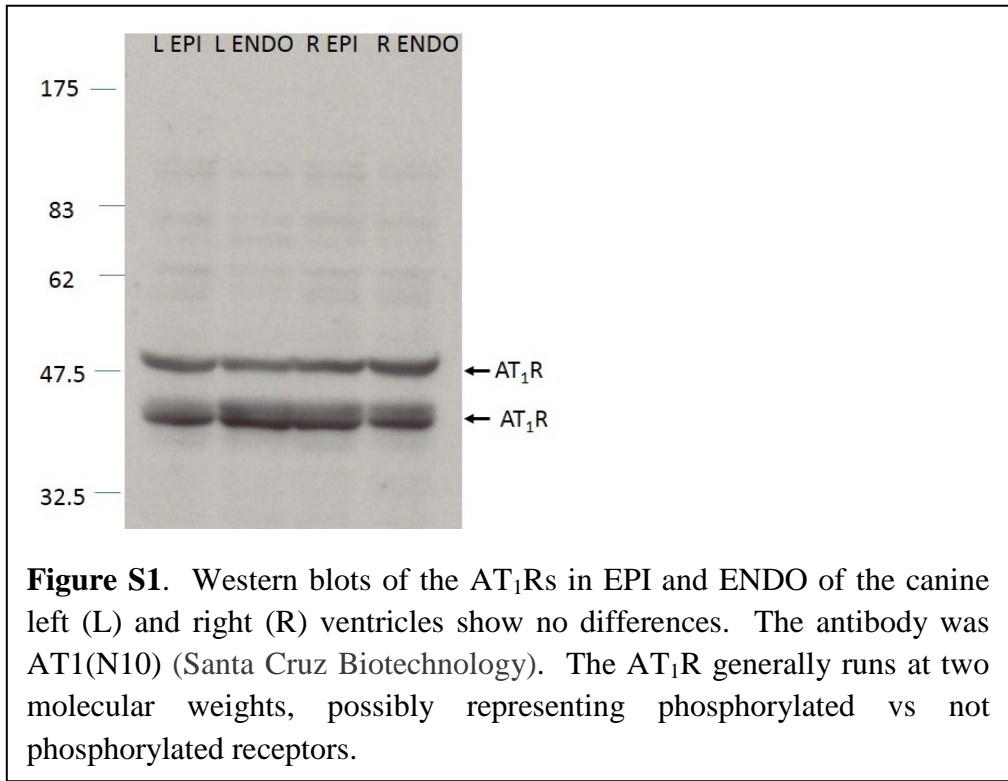

**Figure S1.** Western blots of the AT<sub>1</sub>Rs in EPI and ENDO of the canine left (L) and right (R) ventricles show no differences. The antibody was AT1(N10) (Santa Cruz Biotechnology). The AT<sub>1</sub>R generally runs at two molecular weights, possibly representing phosphorylated vs not phosphorylated receptors.

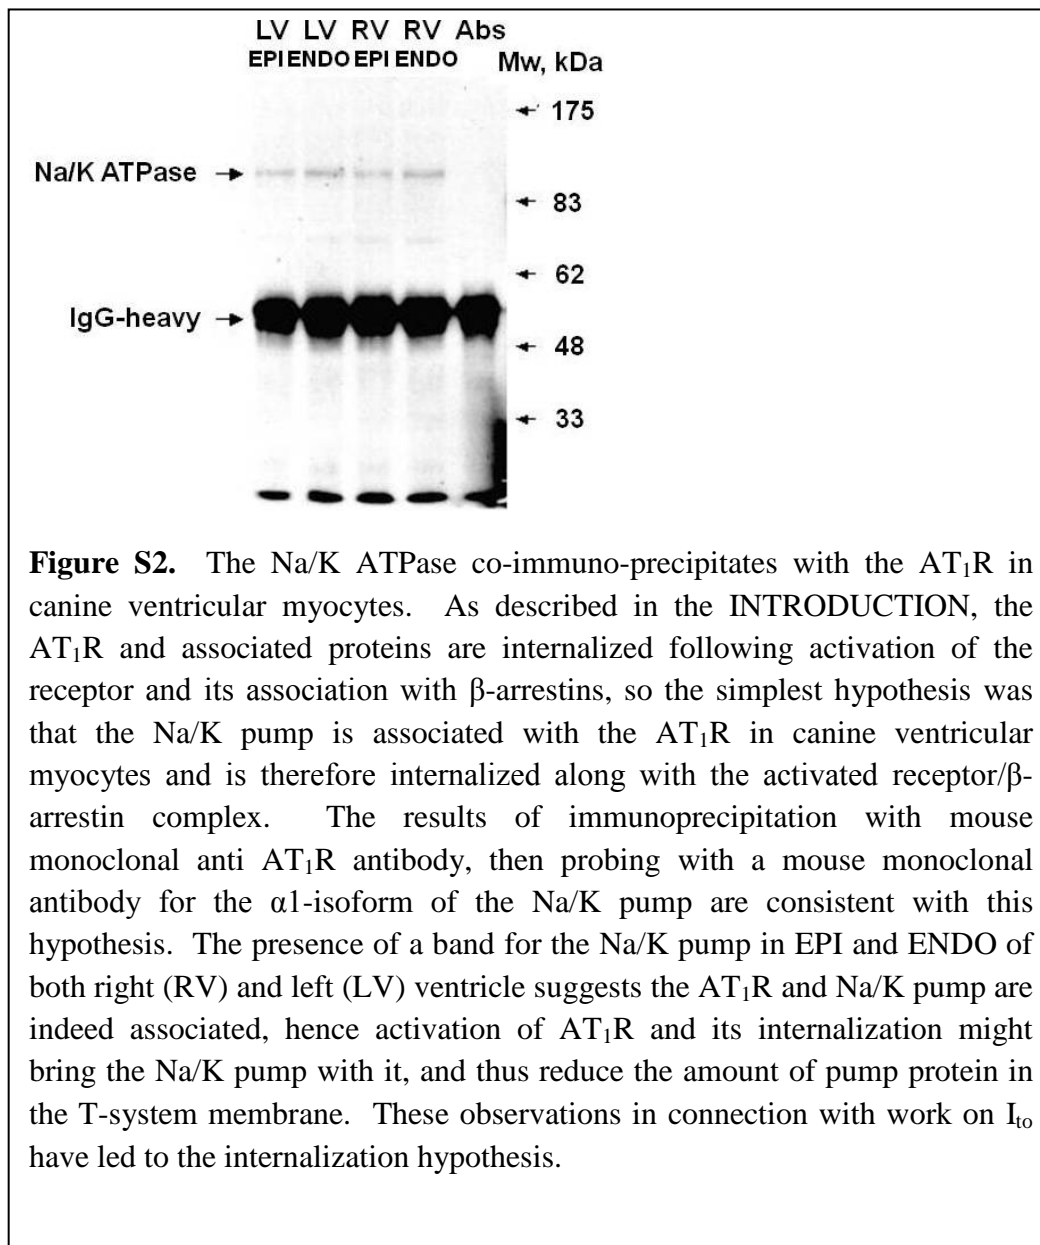

**Figure S2.** The Na/K ATPase co-immuno-precipitates with the AT<sub>1</sub>R in canine ventricular myocytes. As described in the INTRODUCTION, the AT<sub>1</sub>R and associated proteins are internalized following activation of the receptor and its association with  $\beta$ -arrestins, so the simplest hypothesis was that the Na/K pump is associated with the AT<sub>1</sub>R in canine ventricular myocytes and is therefore internalized along with the activated receptor/ $\beta$ -arrestin complex. The results of immunoprecipitation with mouse monoclonal anti AT<sub>1</sub>R antibody, then probing with a mouse monoclonal antibody for the  $\alpha$ 1-isoform of the Na/K pump are consistent with this hypothesis. The presence of a band for the Na/K pump in EPI and ENDO of both right (RV) and left (LV) ventricle suggests the AT<sub>1</sub>R and Na/K pump are indeed associated, hence activation of AT<sub>1</sub>R and its internalization might bring the Na/K pump with it, and thus reduce the amount of pump protein in the T-system membrane. These observations in connection with work on I<sub>to</sub> have led to the internalization hypothesis.

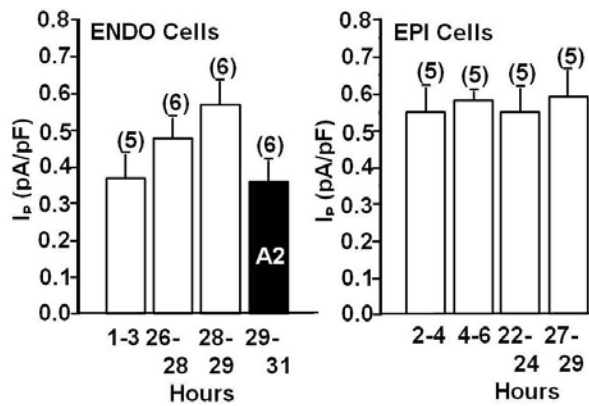

**Figure S3.** The time course of  $AT_1R$  inactivation in isolated myocytes. The Na/K pump current  $I_p$  in ENDO myocytes runs up to EPI levels over a time period of 28-29 hours, presumably because autocrine A2 secretion into the T-system lumen is running down. Consistent with this interpretation, external application of 5  $\mu M$  A2 brings the current back down to its original value. In EPI myocytes, the pump current remains constant over a period of 27-29 hours, presumably because A2 secretion is absent in the T-system of these myocytes. An alternative interpretation is that high affinity  $AT_1R$ s in ENDO are slowly being modified into low affinity  $AT_1R$ s like those in EPI. Either interpretation is possible, but as described in the text, some experiments favor the model in which A2 secretion creates the differences between EPI and ENDO.

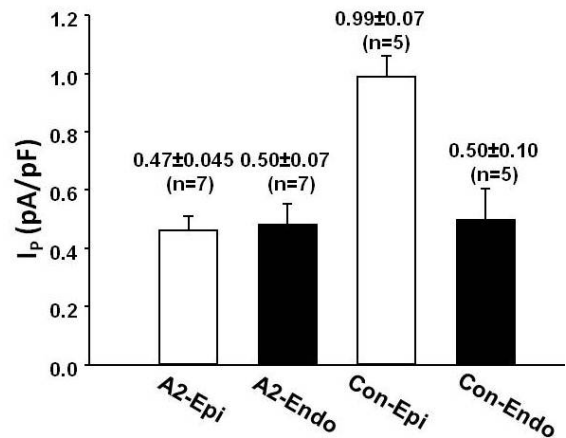

**Figure S4.** In situ delivery of A2 at 37° C. Two chunks of left ventricle were cannulated through a coronary artery and both perfused for 1 hour with Normal Tyrode or Normal Tyrode containing 5  $\mu M$  A2. At the end of this period, cells were isolated as described in METHODS and immediately used for whole cell patch clamp characterization of  $I_p$ . Throughout this process the cells were maintained at 37° C. In the absence of A2, Control myocytes from EPI had about twice the amplitude of  $I_p$  as ENDO myocytes. However, when both groups were perfused with A2,  $I_p$  in both EPI and ENDO were reduced to Con-ENDO level. These data are consistent with results presented in the text, where the studies were done at room temperature and A2 applied directly to the isolated myocytes for 2 hours.

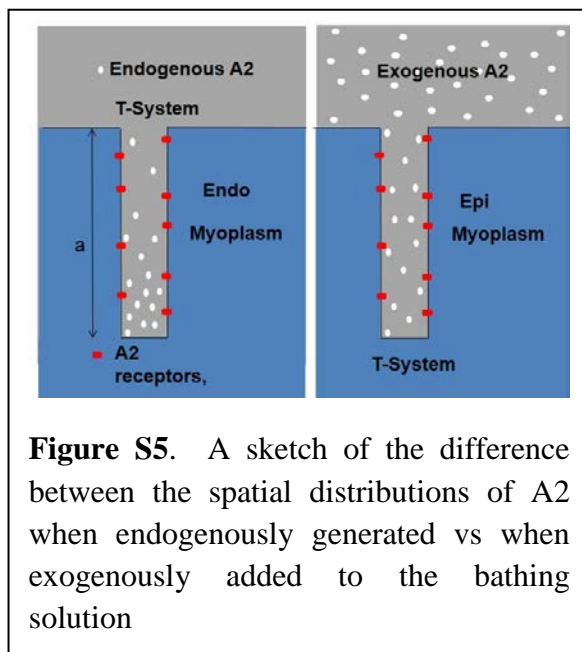

**Figure S5.** A sketch of the difference between the spatial distributions of A2 when endogenously generated vs when exogenously added to the bathing solution
